# Supplementary material
Source: Research Square preprint supplement (doi:10.21203/rs.3.rs-10346507/v1)
Supplement: Supplementary file 1 [file a4ae0cc2164613a98610da4f.docx]

| Este questionário é composto por 26 perguntas que visam avaliar a **intensidade** dos sintomas sensório-motores que você sente **no momento atual**. Você deve responder utilizando uma escala gradual de **concordância** que varia entre *“nem um pouco”* e *“extremamente.* | | | | | | |
| --- | --- | --- | --- | --- | --- | --- |
| **Q** | **Item** | **Nem um pouco** | **Pouco** | **Mais ou menos** | **Muito** | **Extremamente** |
| 1 | É fácil mover seu braço/mão? | 1 | 2 | 3 | 4 | 5 |
| 2 | Durante uma atividade, você sente que seu braço e/ou dedos dobram sem você controlar? | 1 | 2 | 3 | 4 | 5 |
| 3 | Você consegue esticar o braço e abrir a mão com facilidade? | 1 | 2 | 3 | 4 | 5 |
| 4 | Você consegue colocar a palma da mão para cima rapidamente? | 1 | 2 | 3 | 4 | 5 |
| 5 | Você sente uma dor espalhada (em vários locais)? | 1 | 2 | 3 | 4 | 5 |
| 6 | Você sente uma dor bem localizada/delimitada? | 1 | 2 | 3 | 4 | 5 |
| 7 | Você consegue levar a sua mão até a boca? | 1 | 2 | 3 | 4 | 5 |
| 8 | Sentado, você consegue olhar para alguém que está atrás de você, sem usar o apoio das mãos?  *Obs: Considere que você está desencostado da cadeira.* | 1 | 2 | 3 | 4 | 5 |
| 9 | Você sente suas pernas fracas? | 1 | 2 | 3 | 4 | 5 |
| 10 | Você tem dificuldade na marcha (caminhar)? | 1 | 2 | 3 | 4 | 5 |
| 11 | Deitado, quando você muda de posição, sua perna estica sozinha?  *Obs: Se não consegue mudar de posição sozinho, considere outra pessoa fazendo isso por você.* | 1 | 2 | 3 | 4 | 5 |
| 12 | Você consegue se manter sentado sem apoio? | 1 | 2 | 3 | 4 | 5 |
| 13 | Se movimentando, você sente que é difícil manter o equilíbrio? | 1 | 2 | 3 | 4 | 5 |
| 14 | Parado, é fácil para você manter o equilíbrio? | 1 | 2 | 3 | 4 | 5 |
| 15 | Você consegue levar o seu dedo indicador precisamente até a ponta do seu nariz?  *Obs: Sem errar o alvo.* | 1 | 2 | 3 | 4 | 5 |
| 16 | Você consegue alternar rapidamente os movimentos da sua mão: palma para cima, palma para baixo (pelo menos 3 vezes)? | 1 | 2 | 3 | 4 | 5 |
| 17 | Ao lançar um objeto para cima, você consegue pegá-lo sem deixar cair no chão? | 1 | 2 | 3 | 4 | 5 |
| 18 | Você consegue alcançar precisamente um objeto colocado na sua frente? | 1 | 2 | 3 | 4 | 5 |
| 19 | Você acredita que ficaria mais fácil caminhar com alguém te ajudando a ter ritmo (ex.: batendo palmas)? | 1 | 2 | 3 | 4 | 5 |
| 20 | Você nota que tem movimentos involuntários rápidos? | 1 | 2 | 3 | 4 | 5 |
| 21 | Você tem dificuldade de sentir quando alguém toca no seu rosto ou braços? | 1 | 2 | 3 | 4 | 5 |
| 22 | Você consegue sentir com facilidade quando alguém toca no seu tronco ou nas suas pernas? | 1 | 2 | 3 | 4 | 5 |
| 23 | De olhos fechados, se eu colocasse o seu braço em uma posição, você conseguiria posicionar o outro da mesma forma? | 1 | 2 | 3 | 4 | 5 |
| 24 | Você tem dificuldade de identificar um estímulo quente ou frio sobre a sua pele? | 1 | 2 | 3 | 4 | 5 |
| 25 | Quando solicitado, já aconteceu de você não conseguir realizar um movimento que você sabe que é capaz? | 1 | 2 | 3 | 4 | 5 |
| 26 | Já aconteceu de você trocar a ordem das etapas de uma atividade?  *(Ex.: escovar os dentes sem colocar a pasta antes.)* | 1 | 2 | 3 | 4 | 5 |

| Textos em cinza podem ajudar o avaliador durante a entrevista com o paciente | | | |
| --- | --- | --- | --- |
| Área alvo – Sistema 10-20 ou 10/10 | Dimensão | Questões | Mínimo/Máximo |
| C3/C4 | D1 | Q1, Q3, Q4, Q7 | 4 a 20 |
| Cz | D2 | Q8,Q9,Q10, Q12,Q13,Q14 | 6 a 30 |
| Hemisfério cerebelar | D3 | Q15,Q16,Q17,Q18 | 4 a 20 |
| C3/C4 ou AMS | D4 | Q2, Q11, Q19, Q20 | 4 a 20 |
| CP5/CP6 | D5 | Q5, Q6, Q21,Q22,Q23,Q24 | 6 a 30 |
| CP5/CP6 ou Córtex pré-motor | D6 | Q25,Q26 | 2 a 10 |
